# Supplementary material for: Ultra-low Ru doped MOF-derived hollow nanorods for efficient oxygen evolution reaction
Source: Royal Society of Chemistry journal article supplement (doi:10.1039/d2qi01764d), 2022-01-01
Supplement: d2qi01764d1.pdf [file d2qi01764d1.pdf]

**Supporting Information for**  
**Ultra-low Ru Doped MOF-derived Hollow Nanorods for Efficient**  
**Oxygen Evolution Reaction**

Dongmei Liu <sup>a</sup>, Cheng Wang <sup>a</sup>, Zhengming Zhou <sup>c</sup>, Changqing Ye <sup>\*b</sup>, Rui Yu <sup>a</sup>,  
Caiqin Wang <sup>\*d</sup>, Yukou Du <sup>\*a</sup>

<sup>a</sup> *College of Chemistry, Chemical Engineering and Materials Science, Soochow  
University, 199 Renai Road, Suzhou 215123, P.R. China.*

<sup>b</sup> *Jiangsu Key Laboratory for Environmental Functional Materials, Institute of  
Chemistry, Biology and Materials Engineering, Suzhou University of Science and  
Technology, Suzhou 215009, PR China.*

<sup>c</sup> *West China School of Public Health and West China Fourth Hospital, Sichuan  
University, Chengdu, Sichuan, 610041, PR China.*

<sup>d</sup> *College of Science, Nanjing Forestry University, Nanjing 210037, PR China.*

<sup>\*</sup> *Corresponding authors: Tel: 86-512-65880089, Fax: 86-512-65880089;*

*E-mail: yechangqing@mail.usts.edu.cn (C. Ye); wangcai Qin@njfu.edu.cn (C. Wang);*

*duyk@suda.edu.cn (Y. Du)*

## Table of contents

### Experimental Sections

|                                                       |   |
|-------------------------------------------------------|---|
| Synthesis of Co precursor nanorod .....               | 3 |
| Synthesis of Co-MOF-74 (Co-MOF) hollow nanorods ..... | 3 |
| Synthesis of CoFe-MOF hollow nanorods .....           | 4 |
| Synthesis of CoFe/D-MOF and Ru@CoFe/D-MOF .....       | 5 |
| Characterizations .....                               | 6 |
| Electrochemical measurement.....                      | 6 |

### Supporting Figures and Tables

|                                                                                                           |    |
|-----------------------------------------------------------------------------------------------------------|----|
| <b>Fig.S1</b> TEM images of precursors and formation process of hollow nanorod.....                       | 8  |
| <b>Fig.S2</b> TEM images of CoFe/D-MOF-1 and CoFe/D-MOF-3 .....                                           | 8  |
| <b>Fig.S3</b> Elemental mappings of CoFe/D-MOF-2.....                                                     | 9  |
| <b>Fig.S4</b> Elemental mappings and EDS results of Ru@CoFe-MOF .....                                     | 9  |
| <b>Fig.S5</b> HAADF-STEM, mappings and EDS line scans of Ru@CoFe/D-MOF after electrolysis.....            | 10 |
| <b>Fig.S6</b> SEM images of Co-MOF and Ru@CoFe/D-MOF .....                                                | 10 |
| <b>Fig.S7</b> Morphological and structural comparison of Ru@CoFe/D-MOF before and after electrolysis..... | 11 |
| <b>Fig.S8</b> EDS results for each samples .....                                                          | 11 |
| <b>Fig.S9</b> Survey XPS of Ru@CoFe/D-MOF-2 and O 1s region for CoFe-MOF-2 and Ru@CoFe/D-MOF-2 .....      | 12 |
| <b>Fig.S10</b> XPS results for Ru@CoFe/D-MOF after electrochemical stability test .....                   | 12 |
| <b>Fig.S11</b> Structure of Co-MOF .....                                                                  | 13 |
| <b>Fig.S12</b> ESR spectrum of CoFe-MOF, CoFe/D-MOF and Ru@CoFe/D-MOF.....                                | 13 |
| <b>Fig.S13</b> ECSA and $C_{dl}$ values for each samples.....                                             | 13 |
| <b>Fig.S14</b> CV curves of Ru@CoFe/D-MOF-2, CoFe/D-MOF-2, CoFe-MOF-2 and Co-MOF .....                    | 14 |
| <b>Fig.S15</b> CV curves of CoFe/D-MOF-3, CoFe/D-MOF-1, CoFe-MOF-3 and CoFe-MOF-1 .....                   | 14 |
| <b>Fig.S16</b> OER performances of CoFe-MOF with different mass ratio of Co:Fe.....                       | 15 |
| <b>Fig.S17</b> LSV curves and Tafel plots of Ru@CoFe-MOF-2 .....                                          | 15 |
| <b>Fig.S18</b> LSV curves and Tafel plots of r-Ru@CoFe-MOF .....                                          | 16 |
| <b>Fig.S19</b> LSV curves and Tafel plots of Ru@CoFe/CoFe-MOF-2 with different doping amount of Ru .....  | 16 |
| <b>Fig.S20</b> Nyquist plots of Ru@CoFe/D-MOF before and after OER stability test.....                    | 16 |

|                                                                                              |    |
|----------------------------------------------------------------------------------------------|----|
| <b>Fig.S21</b> XPS results of Co 2p and Fe 2p regions for CoFe/D-MOF and Ru@CoFe/D-MOF ..... | 17 |
| <b>Fig.S22</b> Chronopotentiometric curves of Ru@CoFe/D-MOF-2, CoFe-MOF-2 and Co-MOF .....   | 17 |
| <b>Fig.S23</b> Color changes from Co-MOF to CoFe/D-MOF.....                                  | 17 |
| <b>Table S1</b> Summary of other catalysts for OER in alkaline media.....                    | 18 |
| <b>Table S2</b> ICP data.....                                                                | 18 |
| <b>References</b> .....                                                                      | 19 |

## Experimental Sections

### Synthesis of Co precursor nanorod

The Co precursor nanorods were synthesized following the previously reported method.<sup>1</sup> Typically, 1.0 g of polyvinylpyrrolidone (PVP) and 0.64 g of cobalt (II) acetate tetrahydrate were dissolved in 200 mL of ethanol at room temperature to form a pink transparent solution. The above solution was refluxed under magnetic stirring at 85 °C for 2 h and cooled to room temperature. Afterwards, the pink precipitate was collected by centrifugation at 4000 rpm, washed with ethanol for 6 times to remove PVP and dried under vacuum for 12 h.

### Synthesis of Co-MOF-74 (Co-MOF) hollow nanorods

The hollow Co-MOF-74 (denoted as Co-MOF) was prepared based on the Co precursor synthesized before. Firstly, 0.118 g of 2,5-dihydroxyterephthalic acid (H<sub>4</sub>DOBDC) was dissolved in 30 mL N,N-dimethylformamide (DMF) as solution A, 0.1 g Co precursor was dissolved in 20 mL DMF as solution B. Solution A was preheated to 85 °C in the oil bath and quickly poured into solution B, then the resulting mixture was refluxed under magnetic stirring at 85 °C for 2 h. The formed Co-MOF hollow nanorods were then

collected by centrifugation, washed with DMF for several times and dispersed in 80 mL of methanol, heated at 50 °C for 6 h to remove DMF, the orange precipitate was centrifuged and washed with methanol for several times, and dried under vacuum for 12 h.

### **Synthesis of CoFe-MOF hollow nanorods**

For the preparation of CoFe-MOF-2, 12 mg of the as-prepared Co-MOF was dispersed in 1 mL of ethanol as solution C, 6 mg of iron (II) chloride tetrahydrate was dissolved in the mixture of 5 mL deionized (DI) water and 5 mL of ethanol as solution C. Then, at room temperature, solution C was mixed with solution D rapidly and aged for 1 h. The dark green precipitate was centrifuged and washed with ethanol for three times and subsequently dried under vacuum. The synthetic processes of CoFe-MOF-1 and CoFe-MOF-3 are similar to CoFe-MOF-2, except that the amount of iron (II) chloride tetrahydrate was changed to be 12 mg (for CoFe-MOF-1) and 4 mg (for CoFe-MOF-3).

### **Synthesis of CoFe/D-MOF and Ru@CoFe/D-MOF**

For the preparation of CoFe/D-MOF-2, 1 mL of fresh NaBH<sub>4</sub> solution (0.715 M) was dropped into 12 mg of CoFe-MOF-2 (in 5 mL of ethanol) under magnetic agitation, after stirring for 15 min, the dark orange precipitate was centrifuged, washed with ethanol for three times, then dried under vacuum. Afterwards, Ru@CoFe/D-MOF-2 (marked as Ru-2@CoFe/D-MOF-2) was prepared by adding 800 μL (2 mg/mL) of aqueous ruthenium(III) chloride into 8 mg of the CoFe/D-MOF-2 (in 5 mL DI water) and react for 24 h at room temperature, Ru-1@CoFe/D-MOF-2, Ru-3@CoFe/D-MOF-

2, Ru-4@CoFe/D-MOF-2 were synthesized by changing 800  $\mu\text{L}$  of aqueous ruthenium(III) chloride into 500  $\mu\text{L}$ , 1 mL and 1.5 mL.

## **Characterizations**

Low-magnification transmission electron microscopy (TEM) was performed on a HITACHI HT7700 at 120 kV. High-angle annular dark-field scanning transmission electron microscopy (HAADF-STEM) and high-resolution TEM (HRTEM) was recorded on a FEI TecnaiG2F2 FEI Talos F200X S/TEM with a field-emission gun at 200 kV. Scanning electron microscopy (SEM) was conducted on a Hitachi S-4700 instrument operated at 15 kV under high vacuum. X-ray diffractometers (XRD) was carried out by Bruker D8 ADVANCE with Cu K $\alpha$  radiation. The atomic ratio of Fe, Co and Ru was determined by Energy-dispersive X-ray (EDX) spectroscopy and Inductively coupled plasma-optical emission spectroscopy (ICP-OES) which conducted on Hitachi S-4700 instrument (15 kV) and VARIAN 710-ES, respectively. The electron spin resonance (ESR) was conducted on JES-X320 spectrometer at room temperature. The chemical states of CoFe-MOF-2, CoFe/D-MOF-2 and Ru@CoFe/D-MOF-2 were illustrated by X-ray photoelectron spectroscopy (XPS) performed on a VG scientific ESCA Lab 220 XL electron spectrometer using 300 W Al K $\alpha$  radiation.

## **Electrochemical measurement**

The measurements for water splitting were performed on CHI 660E electrochemical analyzer (Chenhua, Shanghai) in 1 M KOH. A three-electrode system was applied for OER tests, in which glassy carbon electrode (GCE) (diameter: 5 mm), graphite rod and saturated Ag/AgCl electrode were served as working electrode, counter electrode and reference electrode respectively. 5 mg catalysts were obtained by mixing the products with carbon powder (mass ratio =1:1). Then, 1 mL ethanol and 10  $\mu$ L 5 wt% Nafion

solution were added into the as-prepared mixed catalysts, after 30 min of ultrasonic treatment, 10  $\mu\text{L}$  of the ink was carefully deposited on GCE and dried naturally.

The reference potentials were transformed into the reversible hydrogen electrode (RHE) referring to the formula:  $E_{\text{RHE}} = E(\text{Ag/AgCl}) + 0.059 * \text{pH} + 0.197 \text{ V}$ , the overpotential ( $\eta$ ) was calculated by  $\eta = E_{\text{RHE}} - 1.23 \text{ V}$ . The linear sweep voltammetry (LSV) was conducted with scanning rate of  $5 \text{ mV s}^{-1}$ . The Tafel plots were obtained following the equation:  $\eta = a + b \lg j$ , where  $j$  means current density, and  $b$  represents Tafel slope. Non-faradic region was selected to perform Cyclic voltammetry (CV) measurements with scanning rates of  $10 \text{ mV s}^{-1}$  to  $50 \text{ mV s}^{-1}$ . The electrochemical impedance spectroscopy (EIS) tests were performed with the frequency ranging from 0.01 to 100 kHz. Notably, all the relevant electrochemical measurements were conducted without iR-correction.

## Supporting Figures and Tables

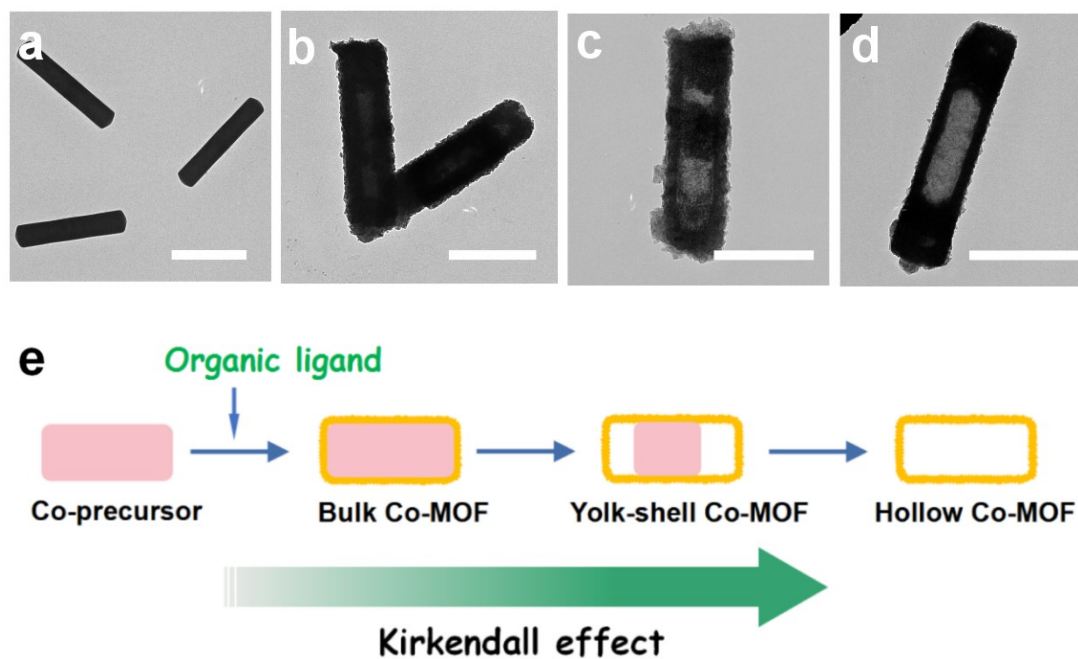

**Fig.S1** TEM images of (a) Co precursor, (b-d) Co-MOF with reaction time prolonged. (e) Schematic diagram for the formation process of hollow Co-MOF nanorods and corresponding Kirkendall effect. Scale bars are 1.0  $\mu\text{m}$  in (a-d).

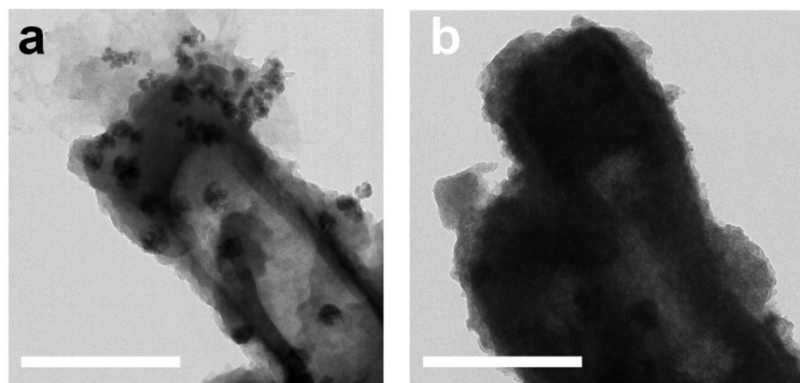

**Fig.S2** TEM images of (a) CoFe/D-MOF-1 and (b) CoFe/D-MOF-3. Scale bars are 500 nm in (a-b).



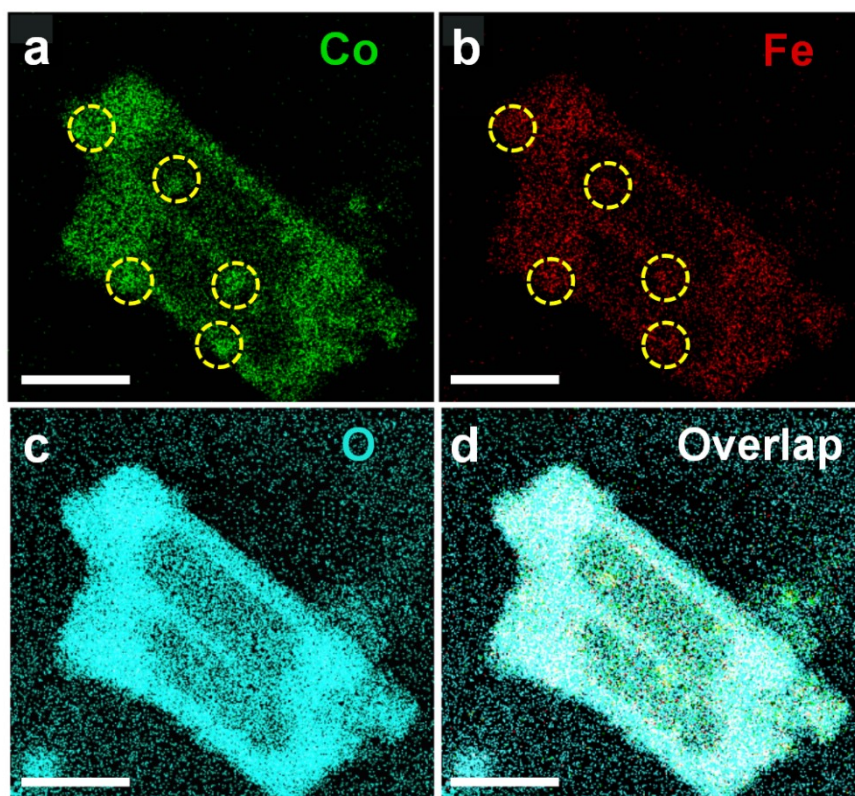

**Fig.S3** EDS element mapping images of Co, Fe and O in CoFe/D-MOF-2 with scale bars of 500 nm.

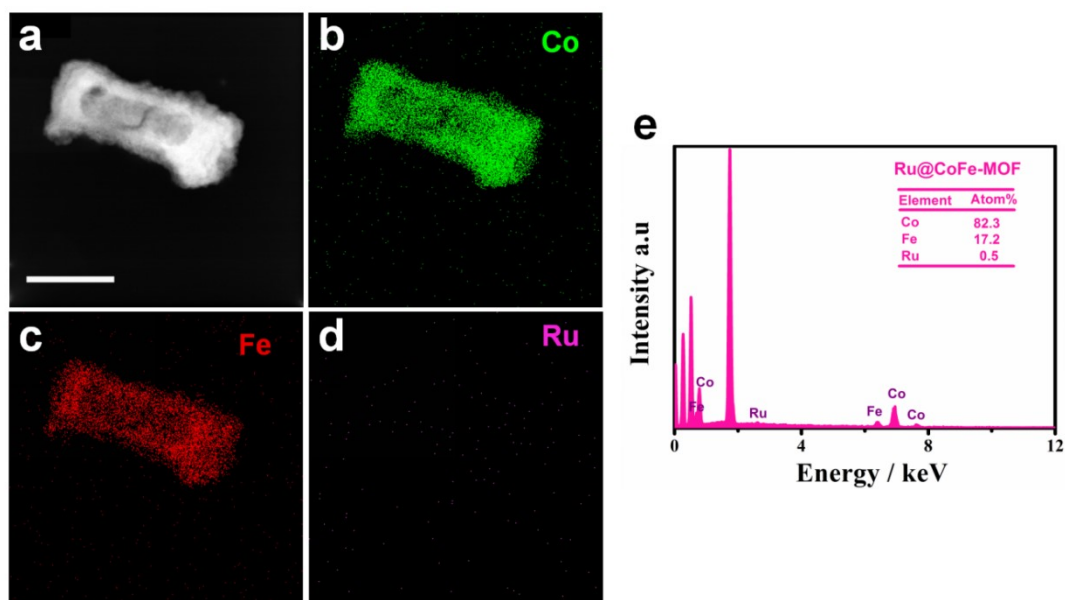

**Fig.S4** (a) HAADF-STEM and (b-d) elemental mapping images of Ru@CoFe-MOF.

Scale bars are 500 nm in (a-d). (e) EDS results of Ru@CoFe-MOF.

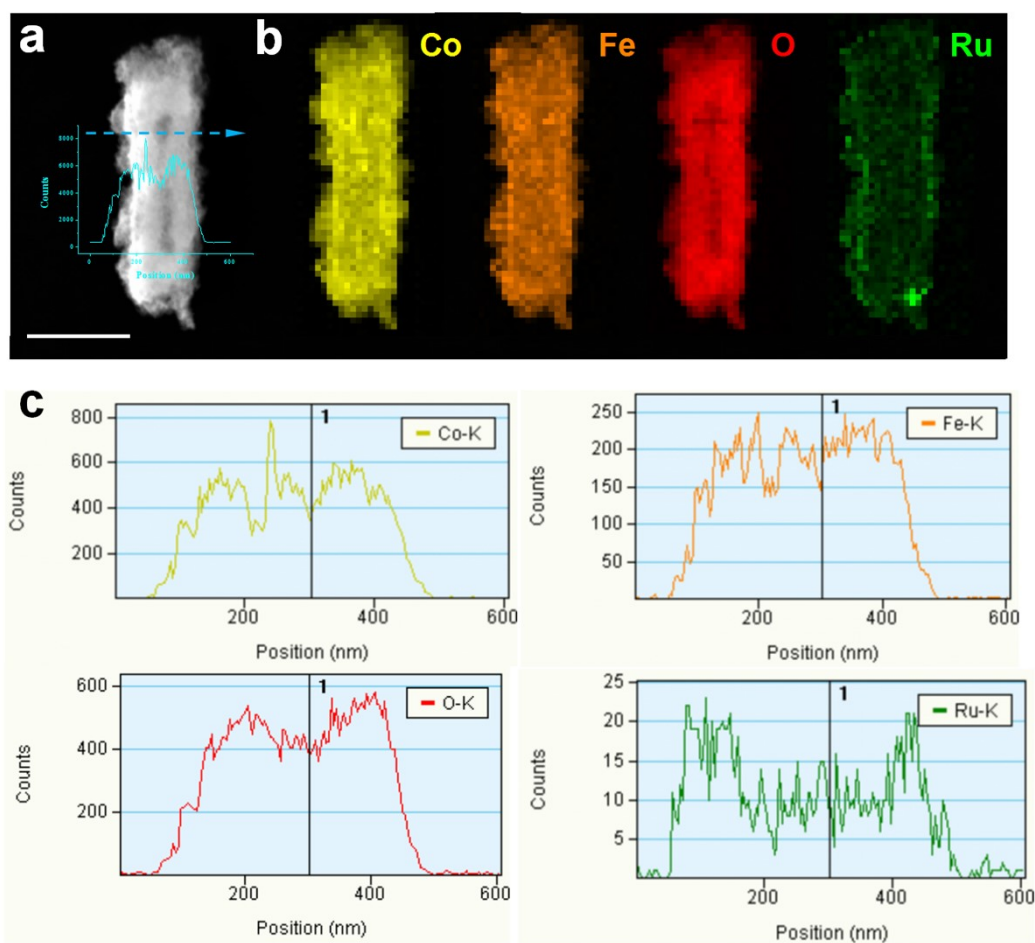

**Fig.S5** (a) HAADF-STEM, (b) elemental mapping images and (c) corresponding EDS line scans of Ru@CoFe/D-MOF after electrolysis. Scale bar is 500 nm.

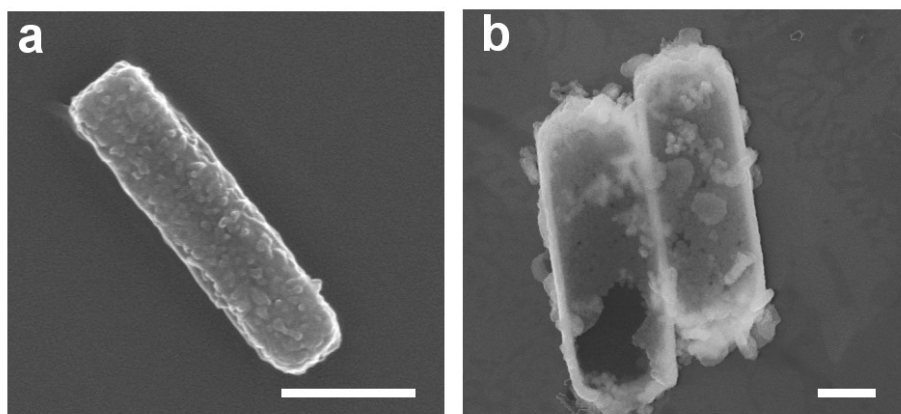

**Fig.S6** SEM images of (a) Co-MOF and (b) Ru@CoFe/D-MOF. Scale bars are: 500 nm in (a) and 200 nm in (b).

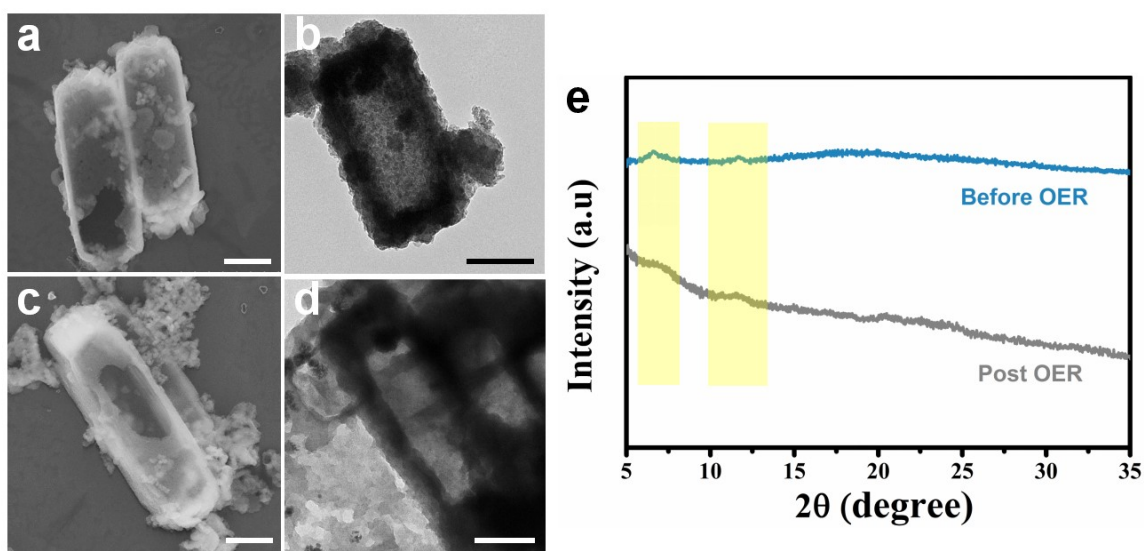

**Fig.S7** SEM and TEM images of Ru@CoFe/D-MOF before (a, b) and after (c, d) stability test. (e) XRD patterns of initial CoFe/D-MOF (blue curve) and Ru@CoFe/D-MOF (gray curve) after electrochemical stability test. Scale bars: 200 nm in (a-d).

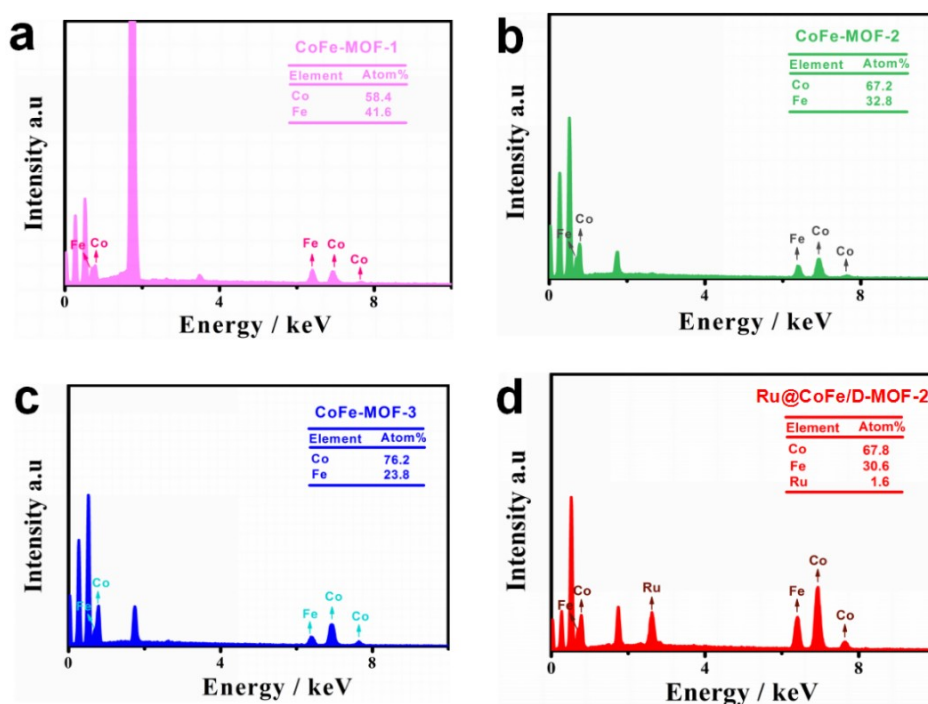

**Fig.S8** Energy dispersive X-ray spectroscopy (EDS) of (a-c) CoFe-MOF with different mass ratio of Co/Fe, (d) Ru@CoFe/D-MOF-2.

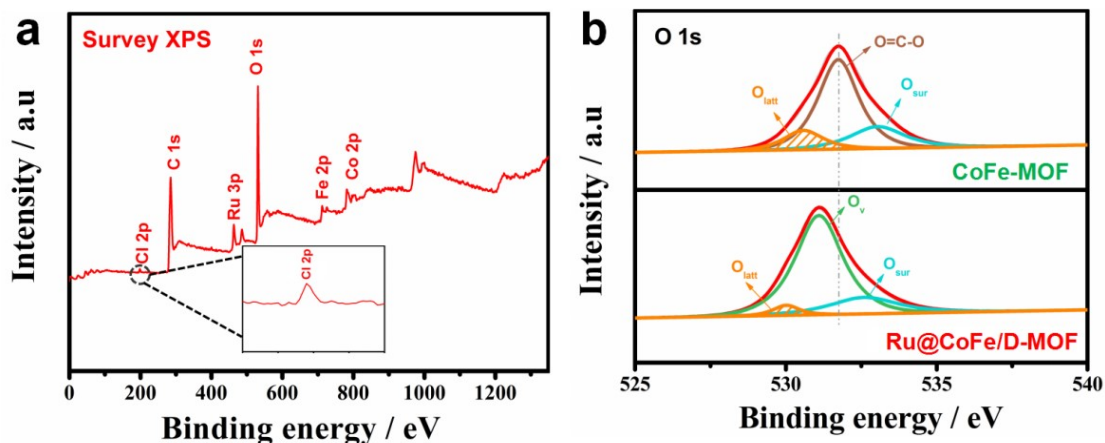

**Fig.S9** (a) Survey XPS of Ru@CoFe/D-MOF-2, (b) O 1s region for CoFe-MOF-2 and Ru@CoFe/D-MOF-2.

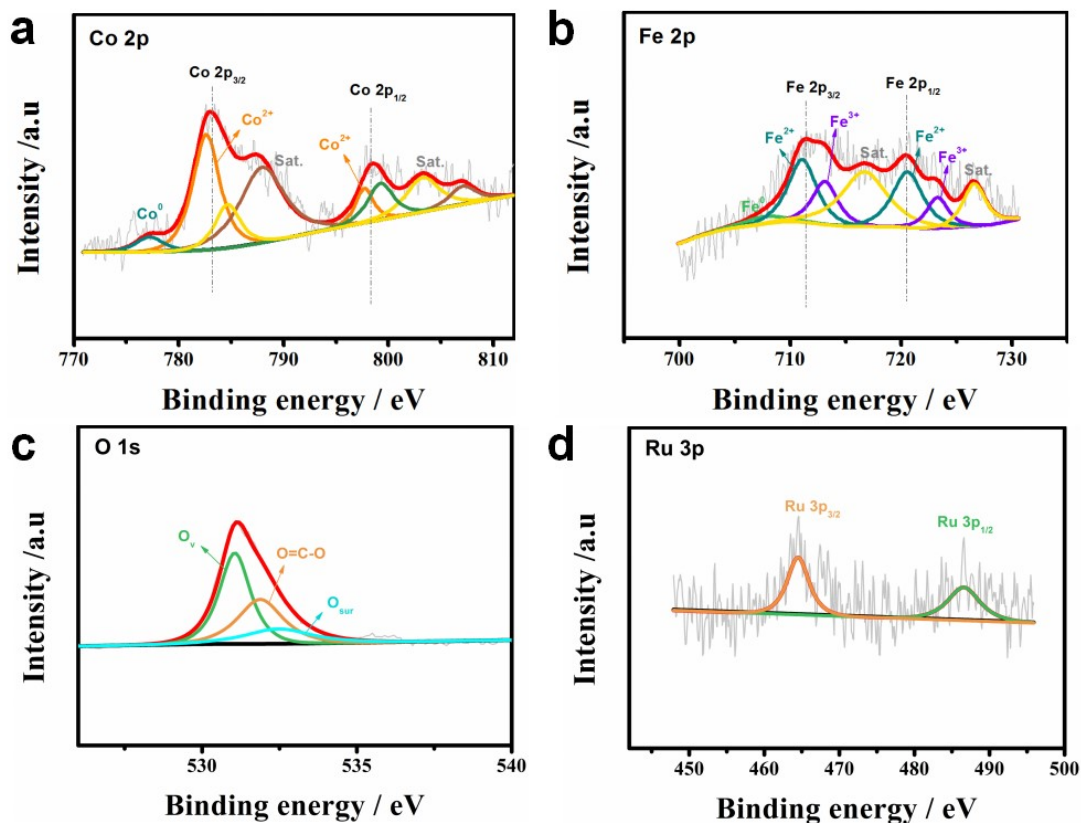

**Fig.S10** High-resolution XPS results of (a) Co 2p, (b) Fe 2p, (c) O 1s and (d) Ru 3p regions for Ru@CoFe/D-MOF after electrochemical stability test.

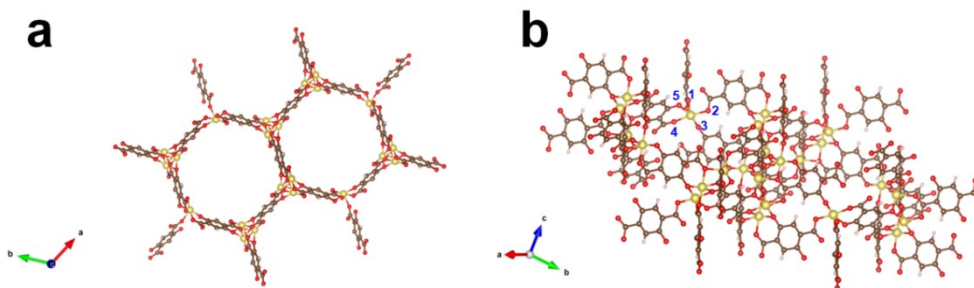

**Fig.S11** Structure of Co-MOF observed from different orientation (a) top view and (b) side view. Color codes: Co:yellow, O:red, C: brown.

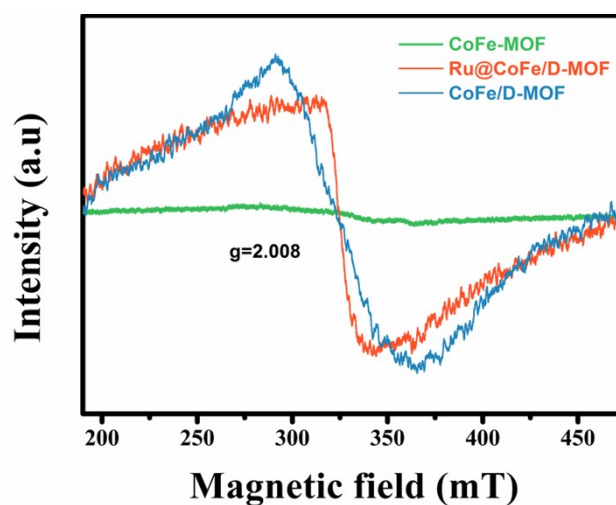

**Fig.S12** ESR spectrum of CoFe-MOF, CoFe/D-MOF and Ru@CoFe/D-MOF. Preparation conditions: solid CoFe-MOF, CoFe/D-MOF and Ru@CoFe/D-MOF catalysts, room temperature.

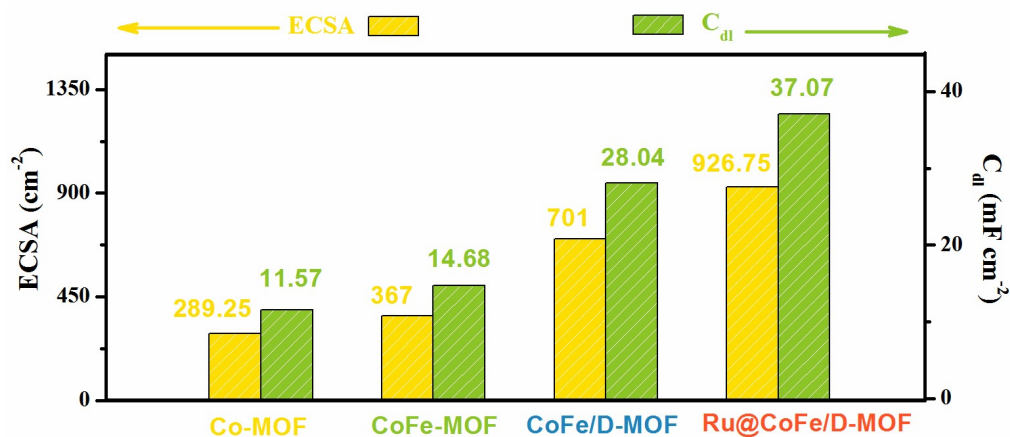

**Fig.S13** ECSA and C<sub>dl</sub> values of Co-MOF, CoFe-MOF-2, CoFe/D-MOF-2 and Ru@CoFe/D-MOF-2.

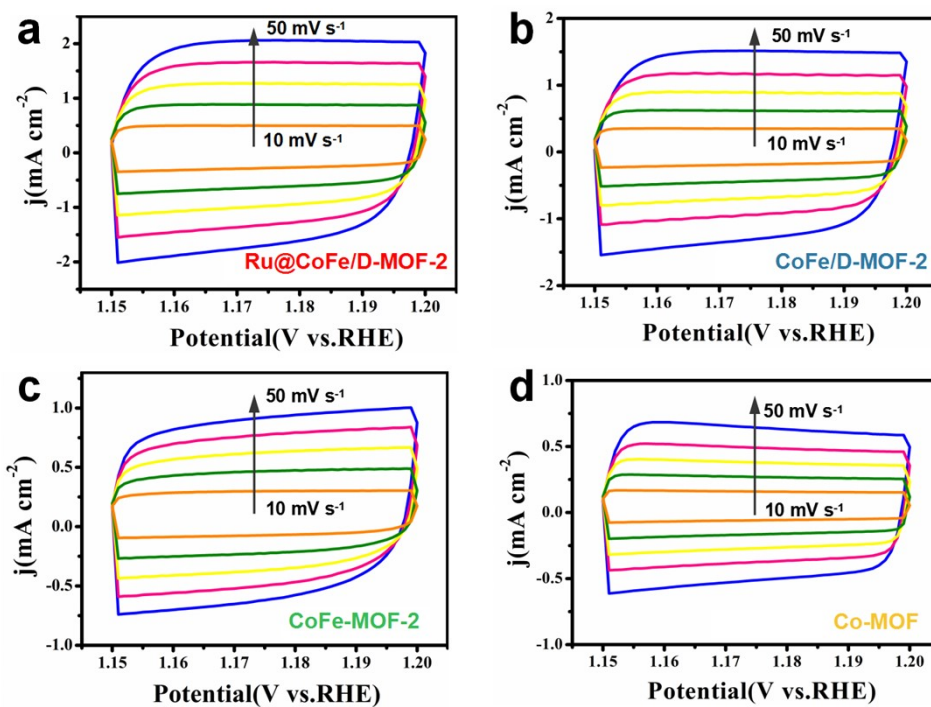

**Fig.S14** CV curves of Ru@CoFe/D-MOF-2, CoFe/D-MOF-2, CoFe-MOF-2 and Co-MOF from scan rates of  $10 \text{ mV s}^{-1}$ ~ $50 \text{ mV s}^{-1}$ .

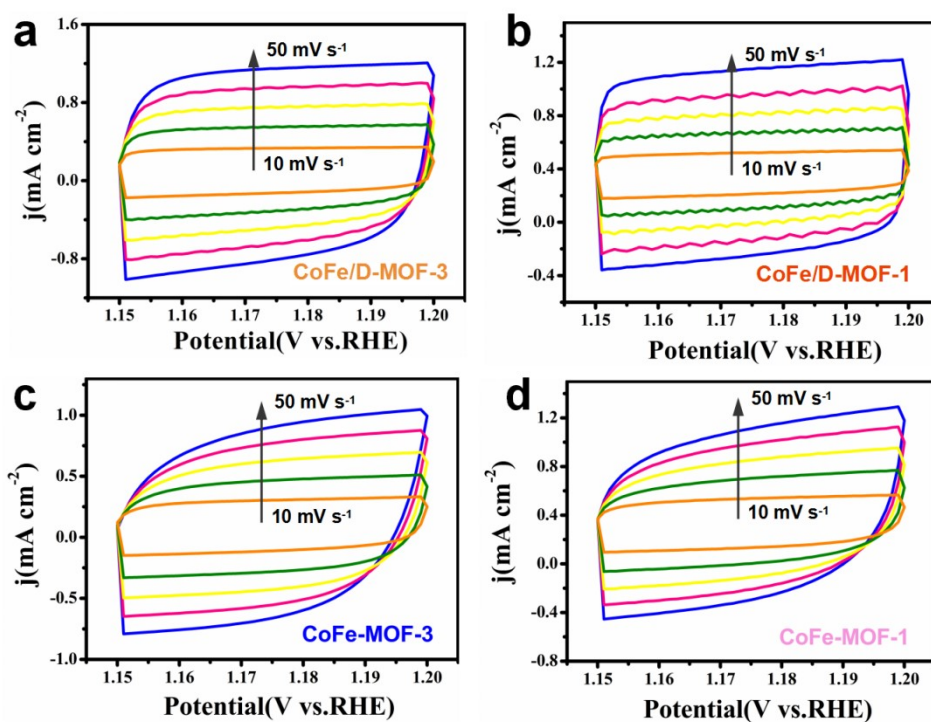

**Fig.S15** CV curves of CoFe/D-MOF-3, CoFe/D-MOF-1, CoFe-MOF-3 and CoFe-MOF-1 from scan rates of  $10 \text{ mV s}^{-1}$ ~ $50 \text{ mV s}^{-1}$ .

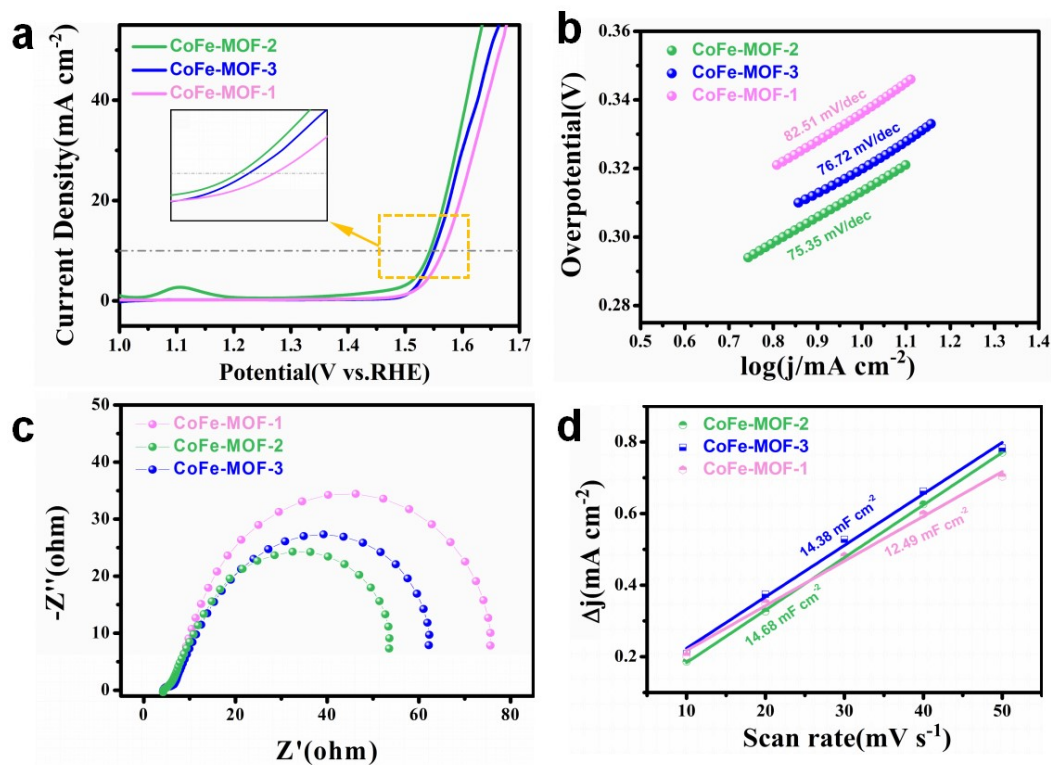

**Fig.S16** (a) LSV polarization curves of CoFe-MOF with different mass ratio of Co:Fe. (b) Corresponding Tafel plots. (c) EIS results. (d) Plots of current density vs. scan rate obtained by non-faradic CV scanning.

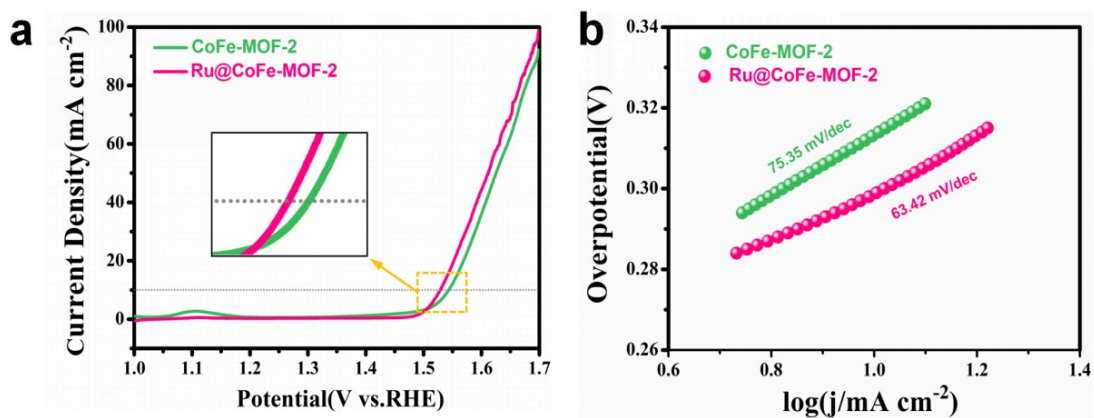

**Fig.S17** (a) LSV polarization curves of CoFe-MOF-2 and Ru@CoFe-MOF-2 in 1 M KOH. (b) Corresponding Tafel plots.

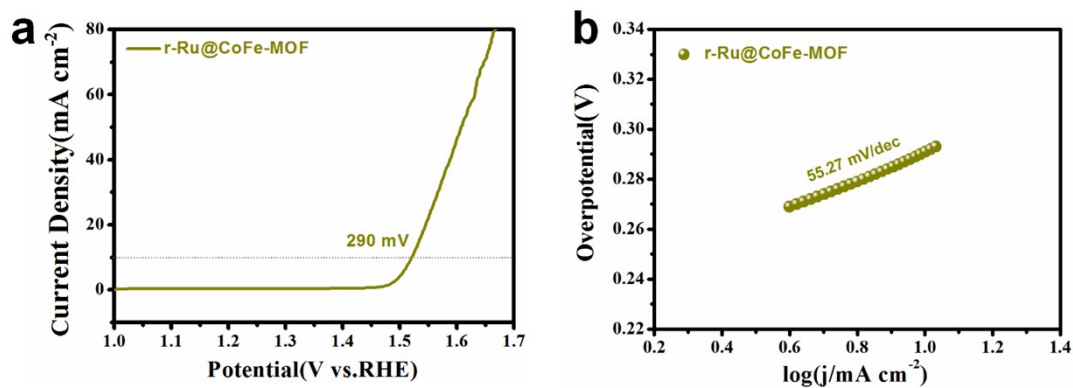

**Fig.S18** (a) LSV polarization curves and (b) Corresponding Tafel plots of r-Ru@CoFe-MOF.

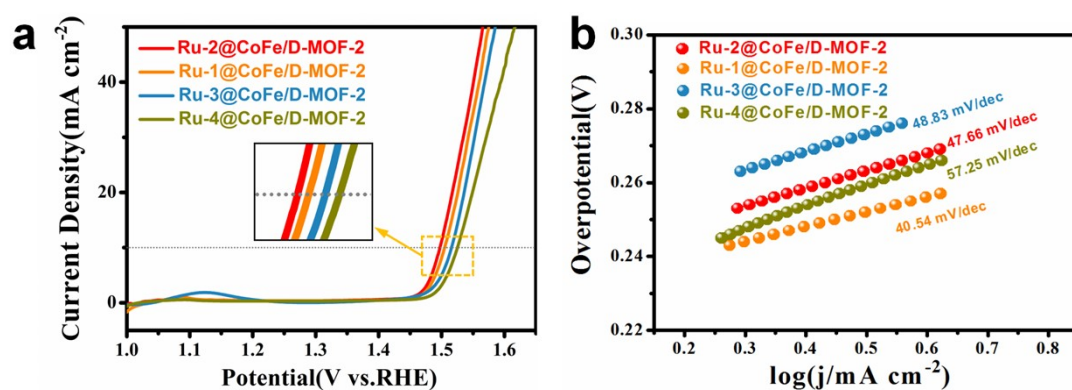

**Fig.S19** (a) LSV polarization curves of Ru-1@CoFe/CoFe-MOF-2, Ru-2@CoFe/CoFe-MOF-2, Ru-3@CoFe/CoFe-MOF-2, Ru-4@CoFe/CoFe-MOF-2 in 1 M KOH. (b) Corresponding Tafel plots.

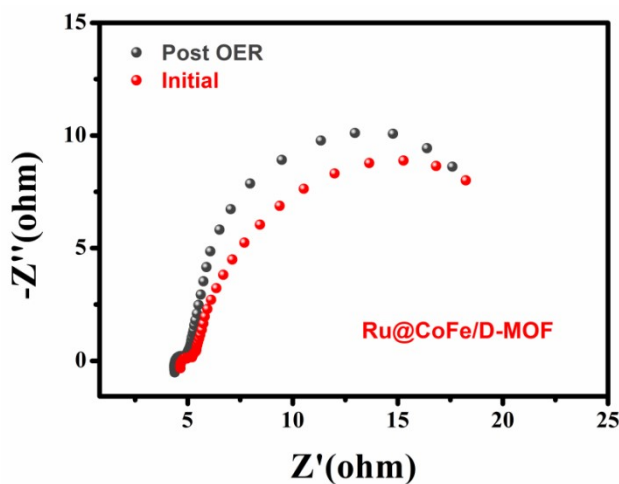

**Fig.S20** Nyquist plots of Ru@CoFe/D-MOF before and after OER stability test. (gray



dots: after durability test, red dots: before durability test)

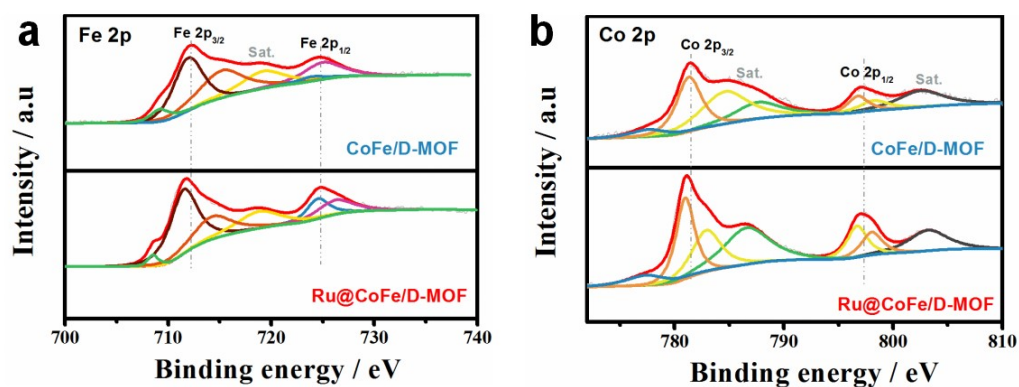

**Fig.S21** High-resolution XPS results of (a) Co 2p and (b) Fe 2p regions for CoFe/D-MOF and Ru@CoFe/D-MOF.

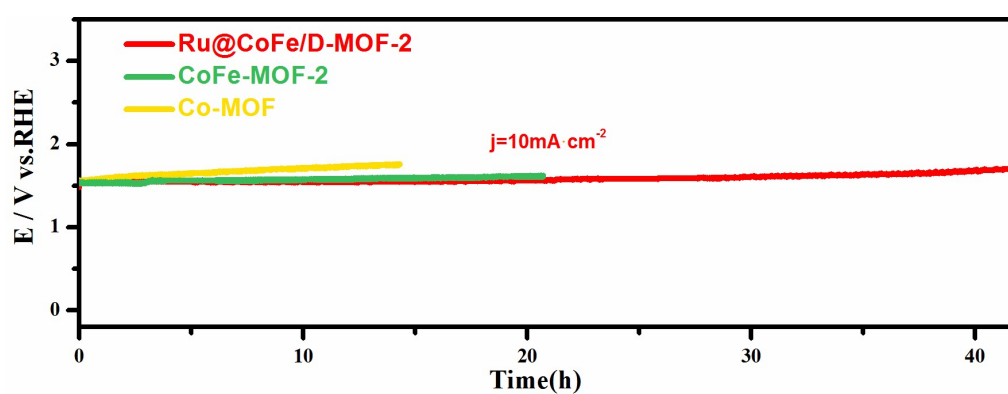

**Fig.S22** Chronopotentiometric curves of Ru@CoFe/D-MOF-2, CoFe-MOF-2 and Co-MOF at current density of  $10 \text{ mA cm}^{-2}$ .

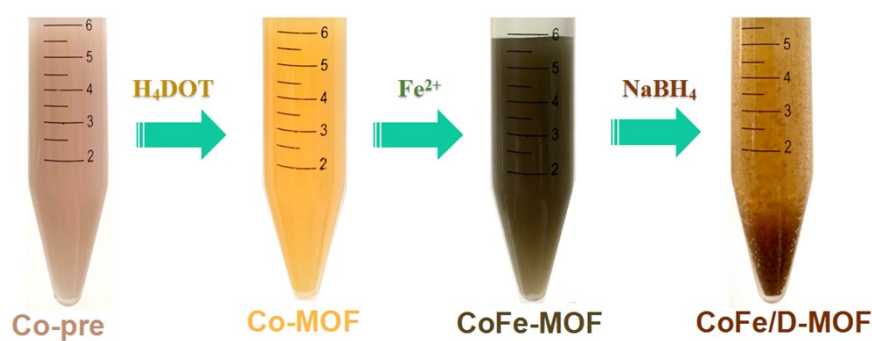

**Fig.S23** Photos of the suspension of Co precursor (Co-pre), Co-MOF, CoFe-MOF and

CoFe/D-MOF.

**Table S1** Summary of various Ru-doped and CoFe-based catalysts for OER in alkaline media.

| Catalyst                                                 | Overpotential (mV)<br>at 10 mA cm <sup>-2</sup> | Tafel slope<br>(mV dec <sup>-1</sup> ) | Reference        |
|----------------------------------------------------------|-------------------------------------------------|----------------------------------------|------------------|
| <b>Ru@CoFe/D-MOF-2</b>                                   | <b>265</b>                                      | <b>37.07</b>                           | <b>This work</b> |
| <b>RuRhCo</b>                                            | 324                                             | 147                                    | [2]              |
| <b>FeCoSe@NCNS</b>                                       | 320                                             | 82.3                                   | [3]              |
| <b>RuNi<sub>1</sub>Co<sub>1</sub>@CMT</b>                | 299                                             | 83                                     | [4]              |
| <b>Ru-CoP/NC</b>                                         | 330                                             | 65                                     | [5]              |
| <b>Ru-FeRu@C/NC</b>                                      | 345                                             | 64.7                                   | [6]              |
| <b>Ru<sub>0.7</sub>Co<sub>0.3</sub> aerogel</b>          | 272                                             | 41.6                                   | [7]              |
| <b>M<sub>2</sub>Ru<sub>1</sub>O</b>                      | 266                                             | 73.45                                  | [8]              |
| <b>Ru@Bpy-POP</b>                                        | 270                                             | 67                                     | [9]              |
| <b>Co<sub>x</sub>Fe<sub>1-x</sub>-MOF-74</b>             | 280                                             | 56                                     | [10]             |
| <b>P-Co<sub>3</sub>O<sub>4</sub></b>                     | 283                                             | 85.3                                   | [11]             |
| <b><math>\alpha</math>-Fe<sub>2</sub>O<sub>3</sub></b>   | 305                                             | 51.8                                   | [12]             |
| <b>CoFe-LDH/GF</b>                                       | 252                                             | 61                                     | [13]             |
| <b>Co<sub>8</sub>Fe<sub>1</sub>-LDH</b>                  | 262                                             | 42                                     | [14]             |
| <b>Co<sub>2</sub>NiS<sub>2.4</sub>(OH)<sub>1.2</sub></b> | 279                                             | 52                                     | [15]             |

**Table S2** ICP data for Co, Fe, Ru contents in different samples.

| Sample        | Co (at%) | Fe (at%) | Ru (at%) |
|---------------|----------|----------|----------|
| Ru@CoFe/D-MOF | 70.2     | 28.3     | 1.5      |
| Ru@CoFe-MOF   | 78.3     | 21.1     | 0.6      |
| CoFe-MOF-1    | 55.3     | 44.7     | --       |

|            |      |      |    |
|------------|------|------|----|
| CoFe-MOF-2 | 68.7 | 31.3 | -- |
| CoFe-MOF-3 | 75.9 | 24.1 | -- |

## References

1. L. Yu, J. F. Yang, X. W. Lou, Formation of CoS<sub>2</sub> nanobubble hollow prisms for highly reversible lithium storage, *Angew. Chem. Int. Ed*, 2016, **55**, 13422-13426.
2. Y. Cui, Z. Xu, D. Chen, T. Li, H. Yang, X. Mu, X. Gu, H. Zhou, S. Liu, S. C. Mu, Trace oxophilic metal induced surface reconstruction at buried RuRh cluster interfaces possesses extremely fast hydrogen redox kinetics, *Nano Energy*, 2021, **90**, 106579.
3. Y. Pan, M. Wang, M. Li, G. Sun, Y. Chen, Y. Liu, W. Zhu, B. Wang, In-situ construction of N-doped carbon nanosnakes encapsulated FeCoSe nanoparticles as efficient bifunctional electrocatalyst for overall water splitting, *J. Energy. Chem.* 2022, **68**, 699-708.
4. Y. Xue, Q. Yan, X. Bai, Y. Xu, X. Zhang, Y. Li, K. Zhu, K. Ye, J. Yan, D. Cao, G. Wang, Ruthenium-nickel-cobalt alloy nanoparticles embedded in hollow carbon microtubes as a bifunctional mosaic catalyst for overall water splitting, *J. Colloid, Interf. Sci.* 2022, **612**, 710-721.
5. Y. R. Hao, H. Xue, J. Sun, N. Guo, T. Song, J. Sun, Q. Wang, Tuning the Electronic Structure of CoP Embedded in N-Doped Porous Carbon Nanocubes Via Ru Doping for Efficient Hydrogen Evolution, *ACS Appl. Mater. Interfaces.* 2021, **13**, 56035-56044.
6. W. Feng, Y. Feng, J. Chen, H. Wang, Y. Hu, T. Luo, C. Yuan, L. Cao, L. Feng, J. Huang, Interfacial electronic engineering of Ru/FeRu nanoparticles as efficient

- trifunctional electrocatalyst for overall water splitting and Zn-air battery, *Chem. Eng. J.*, 2022, **437**, 135456.
7. Z. Lin, S. Liu, Y. Liu, Z. Liu, S. Zhang, X. Zhang, Y. Tian, Z. Tang, Rational design of Ru aerogel and RuCo aerogels with abundant oxygen vacancies for hydrogen evolution reaction, oxygen evolution reaction, and overall water splitting, *J. Power. Sources.*, 2021, **514**, 230600.
8. F. Zhu, J. Xue, L. Zeng, J. Shang, S. Lu, X. Cao, B. F. Abrahams, H. Gu, J. Lang, One-pot pyrolysis synthesis of highly active Ru/RuO<sub>x</sub> nanoclusters for water splitting, *Nano Res*, 2021, **15**, 1020-1026.
9. B. Boro, M.K. Adak, S. Biswas, C. Sarkar, Y. Nailwal, A. Shrotri, B. Chakraborty, B. M. Wong, J. Mondal, Electrocatalytic water oxidation performance in an extended porous organic framework with a covalent alliance of distinct Ru sites, *Nanoscale*, 2022, **14**, 7621-7633.
10. X. Zhao, B. Pattengale, D. Fan, Z. Zou, Y. Zhao, J. Du, J. Huang, C. Xu, Mixed-node metal-organic frameworks as efficient electrocatalysts for oxygen evolution reaction, *ACS Energy Lett*, 2018, **3**, 2520-2526.
11. D. Song, J. Sun, L. Sun, S. Zhai, G.W. Ho, H. Wu, W.Q. Deng, Acidic media regulated hierarchical cobalt compounds with phosphorous doping as water splitting Electrocatalysts, *Adv. Energy. Mater*, 2021, **11**, 2100358.
12. H. Wu, T. Yang, Y. Du, L. Shen, G.W. Ho, Identification of facet-governing reactivity in hematite for oxygen evolution, *Adv. Mater*, 2018, **30**, e1804341.

13. B. Deng, J. Liang, L. Yue, T. Li, Q. Liu, Y. Liu, S. Gao, A.A. Alshehri, K.A. Alzahrani, Y. Luo, X. Sun, CoFe-LDH nanowire arrays on graphite felt: A high-performance oxygen evolution electrocatalyst in alkaline media, *Chinese Chem Lett*, 2022, **33**, 890-892.
14. J. Zhao, X.-R. Wang, F.-W. Chen, C. He, X.-J. Wang, Y.-P. Li, R.-H. Liu, X.-M. Chen, Y.-J. Hao, M. Yang, F.-T. Li, A one-step synthesis of hierarchical porous CoFe-layered double hydroxide nanosheets with optimized composition for enhanced oxygen evolution electrocatalysis, *Inorg. Chem. Front.*, 2020, **7**, 737.
15. B. Wang, C. Tang, H.-F. Wang, X. Chen, R. Cao, Q. Zhang, Core-branch CoNi hydroxysulfides with versatilely regulated electronic and surface structures for superior oxygen evolution electrocatalysis, *J. Energy. Chem.*, 2019, **38**, 8-14.

A
